# Supplementary material for: Vertebral body versus iliac crest bone marrow as a source of multipotential stromal cells: Comparison of processing techniques, tri-lineage differentiation and application on a scaffold for spine fusion
Source: PubMed Central journal article supplement (PMC5967748; doi:10.1371/journal.pone.0197969), 2018-05-24
Supplement: pone.0197969.s003.pdf [file pone.0197969.s003.pdf]

TOTAL CELL count/ml of BM

|           | IC LMP   | IC AC    | VB LMP   | VB AC    |
|-----------|----------|----------|----------|----------|
| sample 1  | 2430000  | 12360000 | 2660000  | 9250000  |
| sample 2  | 8050000  | 12880000 | 8900000  | 17600000 |
| sample 3  | 24470000 | 32890000 | 3830000  | 8330000  |
| sample 4  | 7830000  | 23100000 | 12250000 | 18670000 |
| sample 5  | 5890000  | 18200000 | 10200000 | 17900000 |
| sample 6  | 4900000  | 18180000 | 2660000  | 7560000  |
| sample 7  | 8270001  | 27080000 | 12220000 | 20890000 |
| sample 8  | 4000000  | 16000000 | 4400000  | 10400000 |
| sample 9  | 16840000 | 25260000 | 20820000 | 33870000 |
| sample 10 | 3000000  | 18000000 | 3100000  | 20000000 |
| sample 11 | 10000000 | 20000000 | 5000000  | 15600000 |
| sample 12 | 7000000  | 15300000 | 3400000  | 15000000 |
| sample 13 | 3700000  | 23900000 | 2750000  | 14000000 |
| sample 14 | 7460000  | 7630000  | 4200000  | 7500000  |
| sample 15 | 7550000  | 22910000 | 7450000  | 16000000 |
| sample 16 | 12200000 | 24500000 | 4840000  | 12840000 |
| sample 17 | 5260000  | 30110000 | 5260000  | 14740000 |
| sample 18 | 44000000 | 28000000 | 15790000 | 38360000 |
| Median    | 7505000  | 21455000 | 4920000  | 15300000 |
| Mean      | 10158333 | 20905556 | 7207222  | 16583889 |

colony count/ml of BM

|           | IC LMP  | IC AC   | VB LMP | VB AC   |
|-----------|---------|---------|--------|---------|
| sample 1  | 218.7   | 367.71  | 167.54 | 99.44   |
| sample 2  | 40.25   | 206.08  | 413.85 | 281.6   |
| sample 3  | 55.06   | 106.89  | 74.69  | 116.62  |
| sample 4  | 179.44  | 1647.39 | 170.14 | 525.09  |
| sample 5  | 792.21  | 1638    | 706.35 | 505.68  |
| sample 6  | 14.7    | 37.62   | 4.01   | 15.12   |
| sample 7  | 106.82  | 365.58  | 40.73  | 78.34   |
| sample 8  | 404.41  | 38.15   | 219.19 | 375     |
| sample 9  | 348.16  | 1159.88 | 420.8  | 554.27  |
| sample 10 | 828.57  | 1460    | 1159.4 | 2137.2  |
| sample 11 | 87.57   | 233.89  | 923.89 | 2041.74 |
| sample 12 | 10.54   | 106.22  | 317.17 | 1600.67 |
| sample 13 | 115.99  | 615.83  | 877.2  | 1076.47 |
| sample 14 | 403.64  | 2120    | 98.75  | 1497.6  |
| sample 15 | 753.11  | 2451.37 | 946.15 | 1760    |
| sample 16 | 275.25  | 1033.1  | 195.3  | 1135    |
| sample 17 | 1021.75 | 1341.38 | 274.27 | 80.25   |
| sample 18 | 691.43  | 1550    | 202.5  | 1246.7  |
| Median    | 247     | 824.5   | 246.7  | 539.7   |
| Mean      | 352.6   | 915.5   | 400.7  | 840.4   |
