# Supplementary material for: Vertebral body versus iliac crest bone marrow as a source of multipotential stromal cells: Comparison of processing techniques, tri-lineage differentiation and application on a scaffold for spine fusion
Source: PubMed Central journal article supplement (PMC5967748; doi:10.1371/journal.pone.0197969), 2018-05-24
Supplement: pone.0197969.s004.pdf [file pone.0197969.s004.pdf]

The numbers of CD45<sup>low</sup> CD271<sup>high</sup> cells

|          | IC-BM | VB-BM |
|----------|-------|-------|
| sample 1 | 3328  | 4128  |
| sample 2 | 3200  | 2880  |
| sample 3 | 15680 | 4800  |
| sample 4 | 30720 | 41600 |
| sample 5 | 18240 | 31360 |
| sample 6 | 13440 | 38944 |
| mean     | 14101 | 20619 |

The percentage of cells expressing surface markers

|          | IC-BM<br>Lilineage | VB-BM<br>lineage | IC-BM<br>CD45 | VB-BM<br>CD45 | IC-BM<br>CD73 | VB-BM<br>CD73 | IC-BM<br>CD90 | VB-BM<br>CD90 | IC-BM<br>CD105 | VB-BM<br>CD105 |
|----------|--------------------|------------------|---------------|---------------|---------------|---------------|---------------|---------------|----------------|----------------|
| SAMPLE 1 | 2                  | 1                | 0             | 1             | 100           | 100           | 100           | 100           | 100            | 100            |
| SAMPLE 2 | 0                  | 1                | 1             | 0             | 100           | 99            | 99            | 100           | 96             | 99             |
| SAMPLE 3 | 1                  | 0                | 1             | 1             | 100           | 100           | 100           | 100           | 100            | 100            |
| Mean     | 1                  | 0.6667           | 0.6667        | 0.6667        | 100           | 99.67         | 99.67         | 100           | 98.67          | 99.67          |

The mean fluorescence intensity of MSC markers

|          | IC-BM<br>CD73 | VB-BM<br>CD73 | IC-BM<br>CD93 | VB-BM<br>CD93 | IC-BM<br>CD113 | VB-BM<br>CD105 |
|----------|---------------|---------------|---------------|---------------|----------------|----------------|
| SAMPLE 1 | 5706          | 2667          | 24890         | 12558         | 1650           | 2824           |
| SAMPLE 2 | 4246          | 4555          | 16380         | 12041         | 2730           | 2126           |
| SAMPLE 3 | 2231          | 8556          | 11396         | 25354         | 1544           | 1784           |
| Mean     | 4061          | 5259          | 17555         | 16651         | 1975           | 2245           |

The population doubling time (PDT)

|          | IC-BM    | VB-BM    |
|----------|----------|----------|
| sample 1 | 1.327158 | 1.435462 |
| sample 2 | 1.372612 | 1.371511 |
| sample 3 | 2.342332 | 2.168318 |
| sample 4 | 2.112847 | 2.896773 |
| sample 5 | 2.671289 | 1.714735 |
| sample 6 | 1.937956 | 1.892838 |
| sample 7 | 1.751566 | 1.986504 |
| Mean     | 1.931    | 1.924    |
