# Supplementary material for: Vertebral body versus iliac crest bone marrow as a source of multipotential stromal cells: Comparison of processing techniques, tri-lineage differentiation and application on a scaffold for spine fusion
Source: PubMed Central journal article supplement (PMC5967748; doi:10.1371/journal.pone.0197969), 2018-05-24
Supplement: pone.0197969.s005.pdf [file pone.0197969.s005.pdf]

### calcium levels

|             | IC-BM    | VB-BM    |
|-------------|----------|----------|
| smapple 1 a | 7.947288 | 19.24932 |
| smapple 1 b | 8.712529 | 14.48128 |
| smapple 1 c | 5.239508 | 16.8653  |
| sample 2 a  | 2.815865 | 118.3905 |
| sample 2 b  | 3.335116 | 139.9761 |
| sample 2 c  | 3.162033 | 176.3633 |
| sample 3 a  | 7.354691 | 6.875583 |
| sample 3 b  | 5.498147 | 6.636028 |
| sample 3 c  | 5.078928 | 8.552459 |
| sample 4 a  | 19.15272 | 112.3685 |
| sample 4 b  | 14.72097 | 146.3901 |
| sample 4 c  | 18.25439 | 115.8002 |
| Median      | 6.426    | 65.81    |

### GAG levels

|             | IC-BM    | VB-BM    |
|-------------|----------|----------|
| smapple 1 a | 41.1145  | 135.406  |
| smapple 1 b | 67.1084  | 90.04417 |
| smapple 1 c | 36.7822  | 106.3541 |
| sample 2 a  | 9.514103 | 63.03093 |
| sample 2 b  | 10.53347 | 60.73737 |
| sample 2 c  | 15.88515 | 62.52123 |
| sample 3 a  | 0.339792 | 19.45295 |
| sample 3 b  | 0.594629 | 13.33673 |
| sample 3 c  | 0.594629 | 6.902613 |
| sample 4 a  | 19.1981  | 27.86272 |
| sample 4 b  | 12.82705 | 27.0982  |
| sample 4 c  | 10.53347 | 27.7161  |
| Median      | 11.68    | 44.3     |

### Nile Red/DAPI ratio

|          | IC-BM     | VB-BM     |
|----------|-----------|-----------|
| sample 1 | 0.2219242 | 0.250416  |
| sample 2 | 0.2993495 | 0.143685  |
| sample 3 | 0.2535248 | 0.1478769 |
| sample 4 | 0.1512501 | 0.1273422 |
| mean     | 0.2315    | 0.1673    |
| Median   | 0.2377    | 0.1458    |
