# Supplementary material for: Vertebral body versus iliac crest bone marrow as a source of multipotential stromal cells: Comparison of processing techniques, tri-lineage differentiation and application on a scaffold for spine fusion
Source: PubMed Central journal article supplement (PMC5967748; doi:10.1371/journal.pone.0197969), 2018-05-24
Supplement: pone.0197969.s006.pdf [file pone.0197969.s006.pdf]

FOLD RELATIVE TO UNDIFFERENTIATED MSCs

|            | IC 1W    | IC 2W    | IC 3W    | VB 1W    | VB 2W    | VB 3W    |
|------------|----------|----------|----------|----------|----------|----------|
| RUNX1      |          |          |          |          |          |          |
| smaple 1 a | 1.3993   | 3.721853 | 1.024765 | 0.896558 | 9.58118  | 11.15699 |
| smaple 1 b | 1.3993   | 3.721853 | 1.024765 | 0.896558 | 9.58118  | 11.15699 |
| sample 2 a | 1.811277 | 0.848937 | 1.203285 | 1.354532 | 1.949657 | 1.350952 |
| sample 2 b | 1.811277 | 0.848937 | 1.203285 | 1.354532 | 1.949657 | 1.350952 |
| sample 3 a | 0.77869  | 1.052775 | 0.839116 | 1.497921 | 1.755539 | 0.781434 |
| sample 3 b | 0.77869  | 1.052775 | 0.839116 | 1.497921 | 1.755539 | 0.781434 |
| sample 4 a | 2.898248 | 1.879681 | 2.329512 | 2.063146 | 1.022962 | 2.834673 |
| sample 4 b | 2.898248 | 1.879681 | 2.329512 | 2.063146 | 1.022962 | 2.834673 |

|            |          |          |          |          |          |          |
|------------|----------|----------|----------|----------|----------|----------|
| SPARC      |          |          |          |          |          |          |
| smaple 1 a | 3.946787 | 2.299416 | 0.511379 | 4.710001 | 0.808495 | 0.767076 |
| smaple 1 b | 3.946787 | 2.299416 | 0.511379 | 4.710001 | 0.808495 | 0.767076 |
| sample 2 a | 1.969755 | 1.338653 | 0.5491   | 1.925988 | 1.148832 | 0.564748 |
| sample 2 b | 1.969755 | 1.338653 | 0.5491   | 1.925988 | 1.148832 | 0.564748 |
| sample 3 a | 2.296423 | 0.918896 | 0.341982 | 1.855816 | 0.7011   | 0.368854 |
| sample 3 b | 2.296423 | 0.918896 | 0.341982 | 1.855816 | 0.7011   | 0.368854 |
| sample 4 a | 0.914766 | 0.354759 | 0.16443  | 1.02186  | 0.347879 | 0.105935 |
| sample 4 b | 0.914766 | 0.354759 | 0.16443  | 1.02186  | 0.347879 | 0.105935 |

|            |          |          |          |          |          |          |
|------------|----------|----------|----------|----------|----------|----------|
| COL1       |          |          |          |          |          |          |
| smaple 1 a | 109.3324 | 19.5907  | 2.403751 | 36.31681 | 3.62826  | 2.298258 |
| smaple 1 b | 109.3324 | 19.5907  | 2.403751 | 36.31681 | 3.62826  | 2.298258 |
| sample 2 a | 16.94579 | 9.617305 | 2.791069 | 124.8827 | 24.51238 | 8.328088 |
| sample 2 b | 16.94579 | 9.617305 | 2.791069 | 124.8827 | 24.51238 | 8.328088 |
| sample 3 a | 16.5227  | 1.23068  | 1.435198 | 7.754564 | 1.535384 | 1.353736 |
| sample 3 b | 16.5227  | 1.23068  | 1.435198 | 7.754564 | 1.535384 | 1.353736 |
| sample 4 a | 9.839428 | 3.249153 | 1.077381 | 5.46191  | 1.539347 | 0.56219  |
| sample 4 b | 9.839428 | 3.249153 | 1.077381 | 5.46191  | 1.539347 | 0.56219  |

|            |          |          |          |          |          |          |
|------------|----------|----------|----------|----------|----------|----------|
| ALPL       |          |          |          |          |          |          |
| smaple 1 a | 1.29329  | 0.428914 | 0.809686 | 0.755347 | 0.438557 | 0.239739 |
| smaple 1 b | 1.29329  | 0.428914 | 0.809686 | 0.755347 | 0.438557 | 0.239739 |
| sample 2 a | 2.909981 | 7.131557 | 2.850696 | 3.492574 | 8.956081 | 5.55502  |
| sample 2 b | 2.909981 | 7.131557 | 2.850696 | 3.492574 | 8.956081 | 5.55502  |
| sample 3 a | 14.73092 | 39.45602 | 10.45095 | 2.95076  | 3.296589 | 1.716117 |
| sample 3 b | 14.73092 | 39.45602 | 10.45095 | 2.95076  | 3.296589 | 1.716117 |
| sample 4 a | 2.395262 | 1.335632 | 1.048845 | 5.406691 | 9.731804 | 4.116244 |
| sample 4 b | 2.395262 | 1.335632 | 1.048845 | 5.406691 | 9.731804 | 4.116244 |

## SPP1

|            |          |          |          |          |          |          |
|------------|----------|----------|----------|----------|----------|----------|
| smaple 1 a | 1.163482 | 1.773022 | 1.618923 | 0.835627 | 1.182494 | 1.327075 |
| smaple 1 b | 1.163482 | 1.773022 | 1.618923 | 0.835627 | 1.182494 | 1.327075 |
| sample 2 a | 12.97434 | 8.153401 | 14.02873 | 4.029926 | 4.136408 | 3.571236 |
| sample 2 b | 12.97434 | 8.153401 | 14.02873 | 4.029926 | 4.136408 | 3.571236 |
| sample 3 a | 1.956433 | 0.807875 | 0.483648 | 1.139635 | 0.761415 | 0.704496 |
| sample 3 b | 1.956433 | 0.807875 | 0.483648 | 1.139635 | 0.761415 | 0.704496 |
| sample 4 a | 4.189182 | 1.745665 | 0.631599 | 4.279875 | 5.00001  | 3.473423 |
| sample 4 b | 4.189182 | 1.745665 | 0.631599 | 4.279875 | 5.00001  | 3.473423 |

## BGLAP

|            |          |          |          |          |          |          |
|------------|----------|----------|----------|----------|----------|----------|
| smaple 1 a | 0.352771 | 0.352771 | 6.883903 | 0.823181 | 0.823181 | 1819.067 |
| smaple 1 b | 0.352771 | 0.352771 | 6.883903 | 0.823181 | 0.823181 | 1819.067 |
| sample 2 a | 11.91874 | 5.62086  | 4604.534 | 1.853872 | 0.733341 | 1.765296 |
| sample 2 b | 11.91874 | 5.62086  | 4604.534 | 1.853872 | 0.733341 | 1.765296 |
| sample 3 a | 1.548459 | 0.375577 | 50.56972 | 1.01351  | 0.145103 | 1.99259  |
| sample 3 b | 1.548459 | 0.375577 | 50.56972 | 1.01351  | 0.145103 | 1.99259  |
| sample 4 a | 0.947996 | 0.374824 | 0.723532 | 0.59707  | 0.604249 | 6.595821 |
| sample 4 b | 0.947996 | 0.374824 | 0.723532 | 0.59707  | 0.604249 | 6.595821 |

## SOX9

|            |          |          |          |          |          |          |
|------------|----------|----------|----------|----------|----------|----------|
| smaple 1 a | 3.234397 | 14.56549 | 4.852911 | 149.4623 | 62.06094 | 62.44472 |
| smaple 1 b | 3.234397 | 14.56549 | 4.852911 | 149.4623 | 62.06094 | 62.44472 |
| sample 2 a | 7.440419 | 8.561685 | 8.817242 | 20.87562 | 22.75248 | 76.73141 |
| sample 2 b | 7.440419 | 8.561685 | 8.817242 | 20.87562 | 22.75248 | 76.73141 |
| sample 3 a | 16.66609 | 17.05381 | 15.39945 | 22.17871 | 23.94413 | 47.69914 |
| sample 3 b | 16.66609 | 17.05381 | 15.39945 | 22.17871 | 23.94413 | 47.69914 |
| sample 4 a | 4.455396 | 4.806917 | 13.44886 | 46.7514  | 66.94441 | 16.27719 |
| sample 4 b | 4.455396 | 4.806917 | 13.44886 | 46.7514  | 66.94441 | 16.27719 |

## COL2

|            |          |          |          |          |          |          |
|------------|----------|----------|----------|----------|----------|----------|
| smaple 1 a | 2.804423 | 0.467897 | 1.665396 | 48.07049 | 13088.22 | 2988.398 |
| smaple 1 b | 2.804423 | 0.467897 | 1.665396 | 48.07049 | 13088.22 | 2988.398 |
| sample 2 a | 30.12311 | 11.33625 | 21.24311 | 137.3781 | 75.73117 | 144.7292 |
| sample 2 b | 30.12311 | 11.33625 | 21.24311 | 137.3781 | 75.73117 | 144.7292 |
| sample 3 a | 404.4151 | 482.4644 | 1767.679 | 31.68907 | 157410.1 | 49289.35 |
| sample 3 b | 404.4151 | 482.4644 | 1767.679 | 31.68907 | 157410.1 | 49289.35 |
| sample 4 a | 796.4321 | 1999.13  | 42.95809 | 56.69841 | 179109.1 | 1645.904 |
| sample 4 b | 796.4321 | 1999.13  | 42.95809 | 56.69841 | 179109.1 | 1645.904 |

|            | ACAN     |          |          |          |          |          |
|------------|----------|----------|----------|----------|----------|----------|
| smaple 1 a | 1.146275 | 2.002927 | 9.93E-09 | 0.206901 | 0.432772 | 1.4E-08  |
| smaple 1 b | 1.146275 | 2.002927 | 9.93E-09 | 0.206901 | 0.432772 | 1.4E-08  |
| sample 2 a | 0.920855 | 0.663548 | 7.11E-08 | 1.63642  | 3.400114 | 1.27E-08 |
| sample 2 b | 0.920855 | 0.663548 | 7.11E-08 | 1.63642  | 3.400114 | 1.27E-08 |
| sample 3 a | 3.51479  | 1.724758 | 2.03E-08 | 1.819798 | 7.141355 | 1.81E-07 |
| sample 3 b | 3.51479  | 1.724758 | 2.03E-08 | 1.819798 | 7.141355 | 1.81E-07 |
| sample 4 a | 1.391807 | 11.05808 | 3.8E-08  | 4.447731 | 5.50308  | 2.71E-08 |
| sample 4 b | 1.391807 | 11.05808 | 3.8E-08  | 4.447731 | 5.50308  | 2.71E-08 |
