# Supplementary material for: Vertebral body versus iliac crest bone marrow as a source of multipotential stromal cells: Comparison of processing techniques, tri-lineage differentiation and application on a scaffold for spine fusion
Source: PubMed Central journal article supplement (PMC5967748; doi:10.1371/journal.pone.0197969), 2018-05-24
Supplement: pone.0197969.s007.pdf [file pone.0197969.s007.pdf]

### % OF MSCs of CD45 NEGATIVE CELLS

|                 | IC-BM | VB-BM |
|-----------------|-------|-------|
| SAMPLE 1        | 71    | 51    |
| SAMPLE 2        | 62    | 90    |
| SAMPLE 3        | 68    | 61    |
| Mean            | 67    | 67.33 |
| Std. Error of M | 2.646 | 11.7  |

### ALP/DNA RATIO

|                 | IC-BM E  | IC-BM O | VB-BM E | VB-BM O |
|-----------------|----------|---------|---------|---------|
| SAMPLE 1        | 0.003    | 0.1     | 0.008   | 0.23    |
| SAMPLE 2        | 0.006    | 0.206   | 0.001   | 0.421   |
| SAMPLE 3        | 0.007    | 0.044   | 0.06    | 0.135   |
| SAMPLE 4        | 0.025    | 0.12    | 0.09    | 0.28    |
| SAMPLE 5        | 0.02     | 0.054   | 0.02    | 0.076   |
| SAMPLE 6        | 0.001    | 0.18    | 0.01    | 0.24    |
| Mean            | 0.01033  | 0.1173  | 0.0315  | 0.2303  |
| Std. Error of M | 0.003997 | 0.02676 | 0.0145  | 0.04893 |
